# Supplementary material for: Cytosine-functionalized polyurethane foam and its use as a sorbent for the determination of gold in geological samples
Source: Royal Society of Chemistry journal article supplement (doi:10.1039/c5ay01737h), 2015-11-13
Supplement: c5ay01737h1.pdf [file c5ay01737h1.pdf]

**Table S1** Operation parameters of iCAP 7400 ICP-OES.

| Parameter                                      | Value      |                |
|------------------------------------------------|------------|----------------|
| RF power (W)                                   | 1150       |                |
| Auxiliary gas flow rate (L min <sup>-1</sup> ) | 0.5        |                |
| Carrier gas flow rate (L min <sup>-1</sup> )   | 0.6        |                |
| Coolant gas flow rate (L min <sup>-1</sup> )   | 12         |                |
| Frequency of RF generator (MHz)                | 27.12      |                |
| Exposure time (s) Axial                        | Low (UV)   | High (Visible) |
|                                                | 20         | 10             |
| Analytical wavelength (nm)                     | Au 242.795 |                |

**Table S2** Details of certified reference materials.

| Sample | Description of certified reference materials                                | Sources                                                            |
|--------|-----------------------------------------------------------------------------|--------------------------------------------------------------------|
| WMS-1a | Massive sulphide PGE material                                               | Canada Centre for Mineral and Energy Technology (CANMET), Hamilton |
| MA-2c  | Siliceous gold ore                                                          | CANMET, Hamilton                                                   |
| GAu 14 | Soil from carbonate rock with micrograined gold                             | Institute of Geophysical and Geochemical Exploration (IGGE), China |
| GAu 16 | Poor ore from altered sandstone gold deposit                                | IGGE, China                                                        |
| GAu 18 | Rich ore from hydrothermal metasomatic gold deposit in shattered fault belt | IGGE, China                                                        |

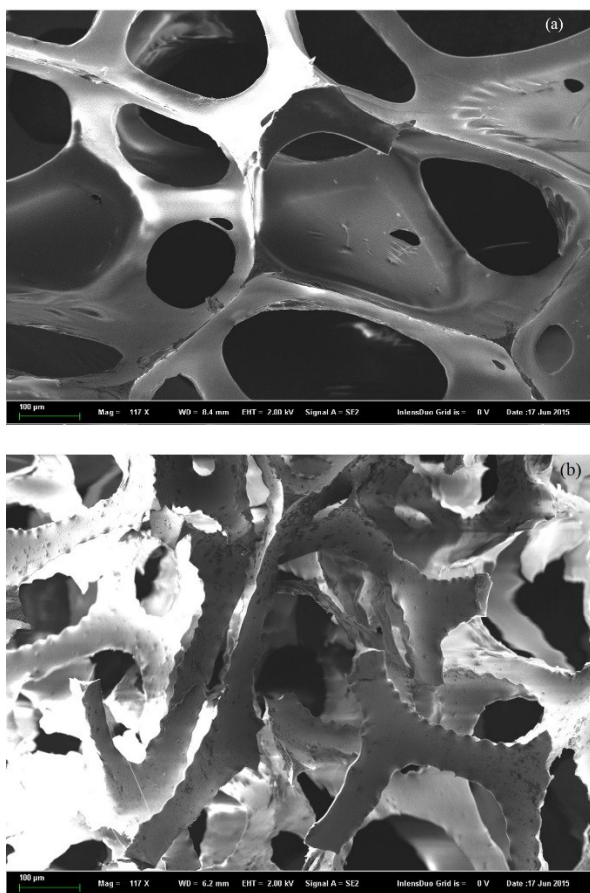

Fig. S1 SEM images of (a) PUF, (b) PUF-Cyt.

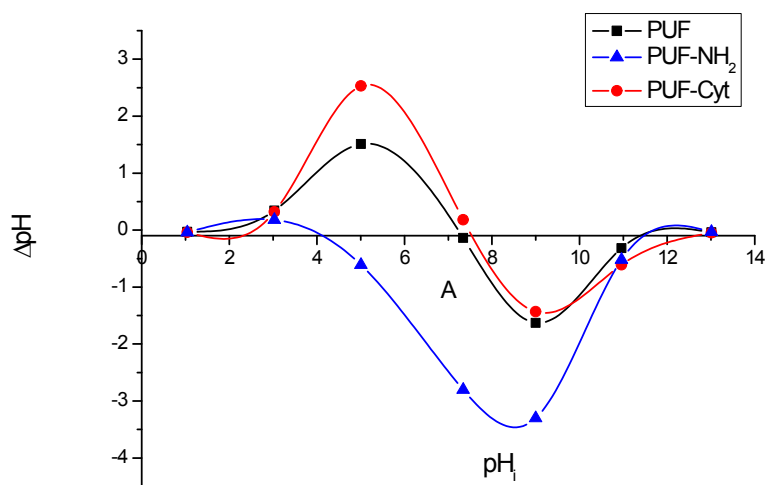

Fig. S2 Zero point charge pH ( $pH_{ZPC}$ ) of PUF, PUF-NH<sub>2</sub> and PUF-Cyt

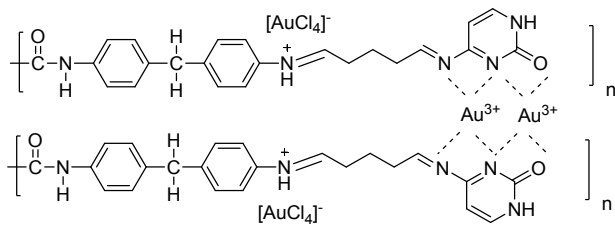

Fig. S3 Mechanism of complex formation.

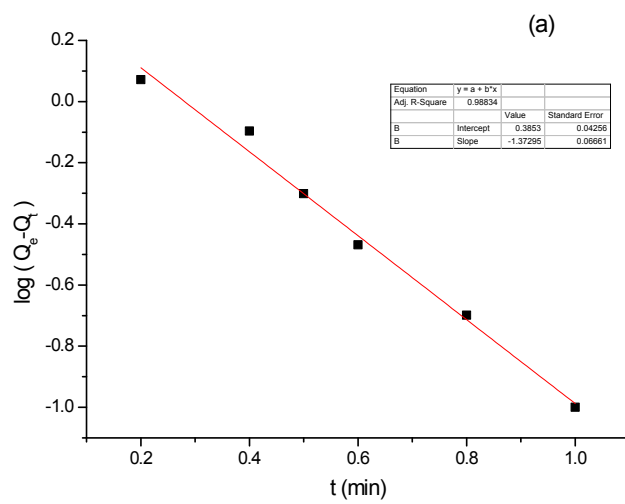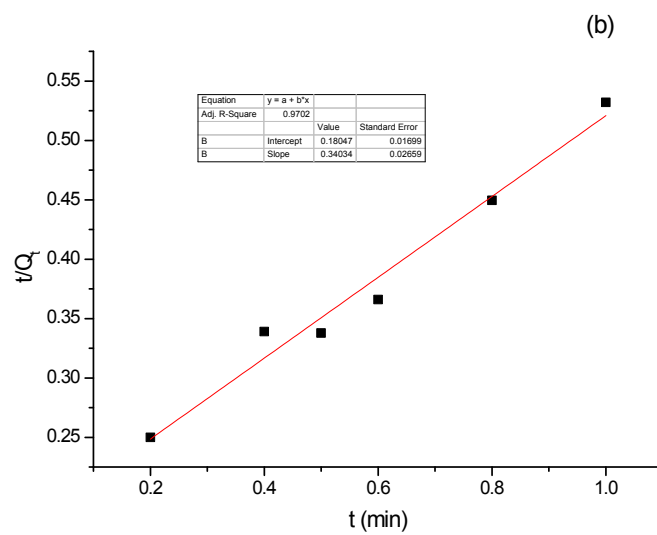

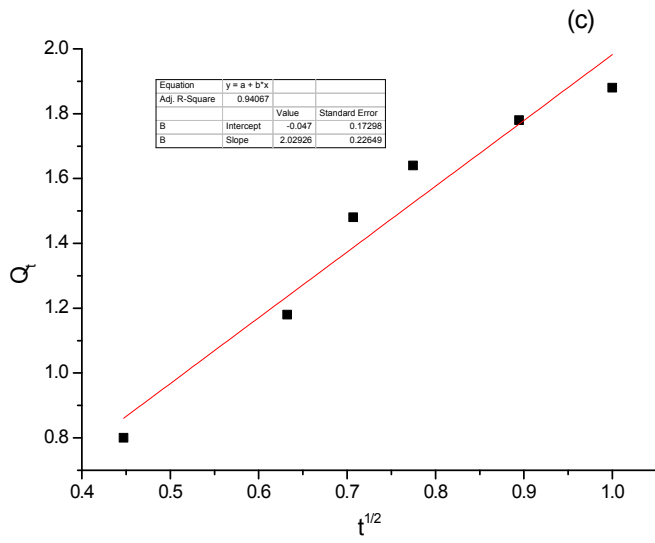

**Fig. S4** Kinetics of sorption of Au(III) onto PUF-Cyt: (a) pseudo-first-order; (b) pseudo-second-order; and (c) intraparticle diffusion

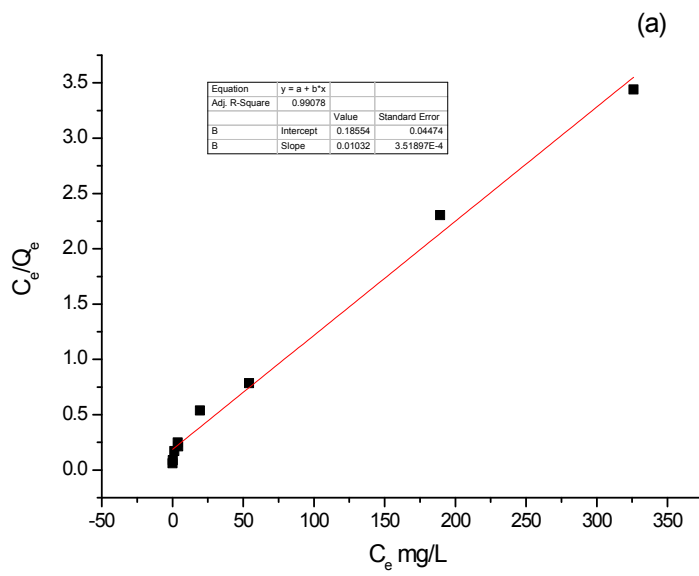

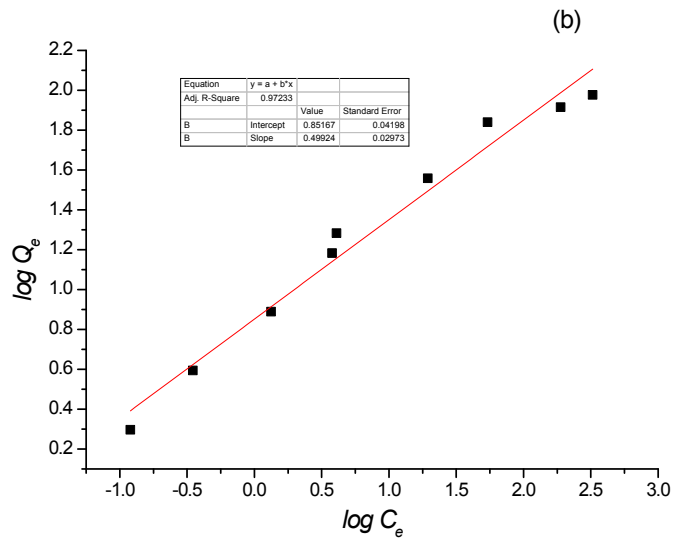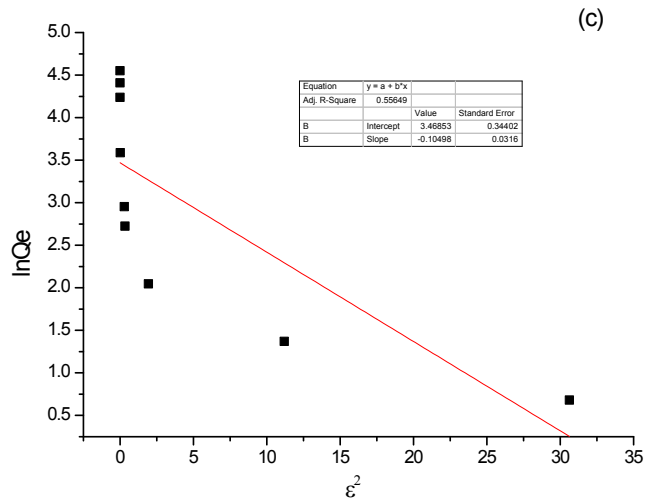

**Fig. S5** (a) The Langmuir sorption isotherm for batch method, (b) the Freundlich sorption isotherm for batch method and (c) the D-R sorption isotherm for batch method (temperature: 25 °C).

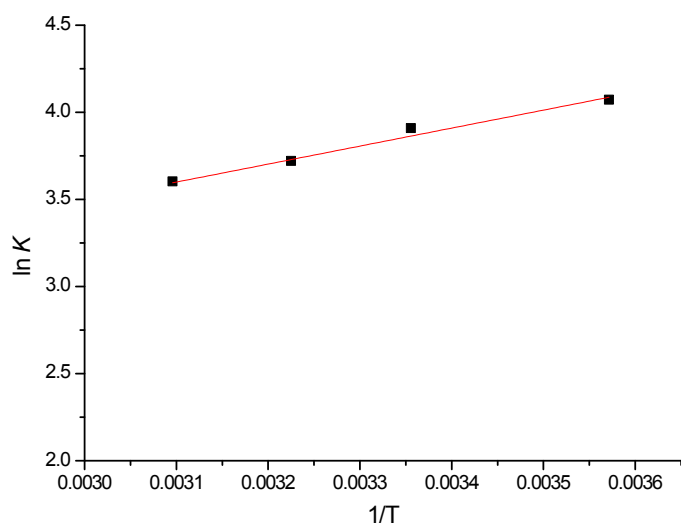

**Fig. S6** The plot of  $\ln K$  versus  $1/T$  for the determination of thermodynamic parameters for adsorption of Au(III) on the PUF-Cyt.

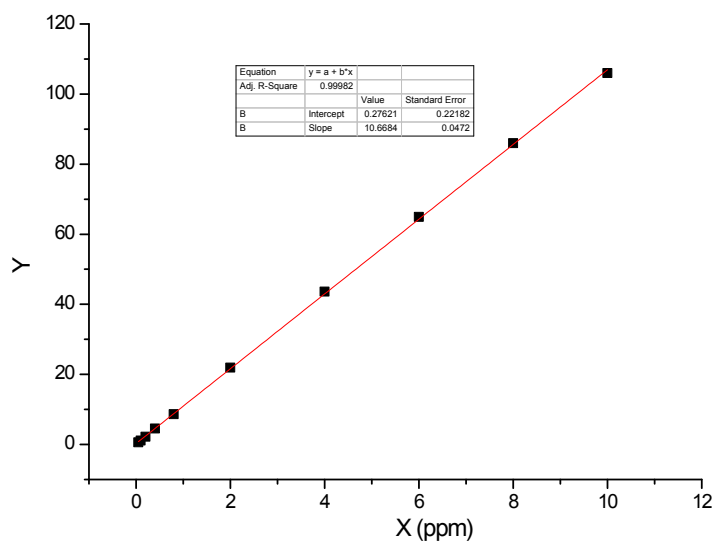

**Fig. S7** Calibration curves for gold.

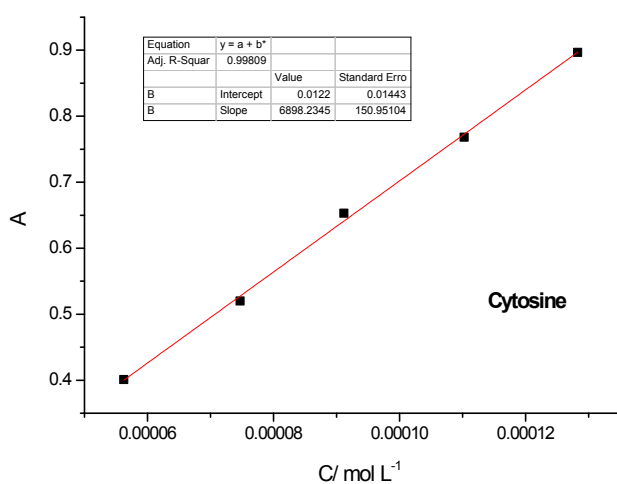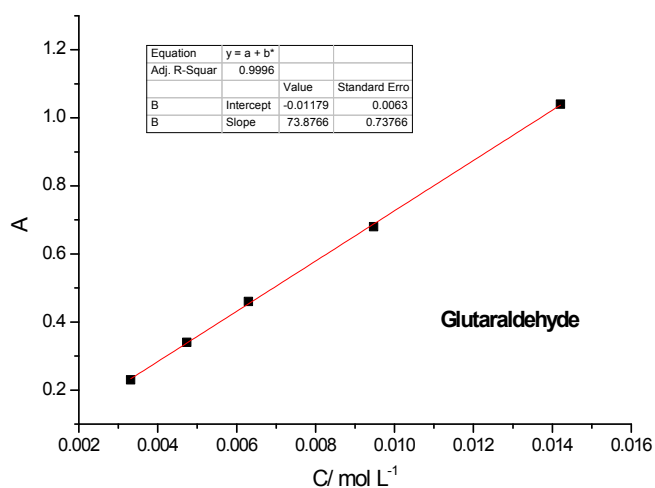

**Fig. S8** Absorbance versus concentrations of cytosine and glutaraldehyde.

The mass fraction of cytosine moiety in the PUF-Cyt is nearly 8.7%. The average loading of the ligands was estimated by subtraction method: (i) The concentration of Cyt in the phosphate buffer after reaction was calculated according to the Beer's law using an extinction coefficient of  $6898 \text{ M}^{-1} \text{ cm}^{-1}$  at 267 nm. (ii) Using the calibration curve constructed from 6 standards of different concentrations of Cyt in phosphate buffer, the extinction coefficient of the Cyt ( $\epsilon_{\text{Cyt}}$ ) was derived as  $345 \text{ M}^{-1} \text{ cm}^{-1}$ . Thus, the concentration of residual Cyt molecules in the supernatant was calculated according to  $\epsilon_{\text{Cyt}}$ . (iii) The amount of Cyt bound to the surface of PUF was concluded from the

difference of the amount of Cyt molecules in the incubation solution and the amount of unbounded Cyt measured in the supernatant after reaction. The maximum absorption wavelength and the extinction coefficient of glutaraldehyde are 234 nm and 73.87, respectively. The two absorption peaks of Cyt are non-overlapping. In addition, the initial feed molar ratio of Cyt to glutaraldehyde is 1:5, while the extinction coefficient of Cyt is much higher than glutaraldehyde. The signal of residual glutaraldehyde is too low to interfere the determination. According to the above data, the 5% of Cyt is left, which means 0.095 g of Cyt was modified on PUF. Based on the weight of raw materials, the mass fraction of cytosine moiety in the PUF-Cyt can easily be obtained.
